# Supplementary material for: Experimental and computational evidence of the intermolecular motifs in the crystal packing of luminescent pentacoordinated gallium(iii) complexes
Source: Royal Society of Chemistry journal article supplement (doi:10.1039/b606895b), 2006-01-01
Supplement: b606895b.pdf [file b606895b.pdf]

## Experimental and Computational Evidences of the Intermolecular Motifs in the Crystal Packing of Luminescent Pentacoordinated Gallium(III) Complexes

Alessandra Crispini,<sup>a</sup> Iolinda Aiello,<sup>a</sup> Massimo La Deda,<sup>a</sup> Irene De Franco,<sup>a</sup> Mario Amati,<sup>b</sup> Francesco Lelj,<sup>\*b</sup> and Mauro Ghedini<sup>\*a</sup>

<sup>a</sup> Centro di Eccellenza CEMIF.CAL-LASCAMM, CR-INSTM Unità della Calabria, Dipartimento di Chimica, Università della Calabria, I-87036 Arcavacata di Rende (CS), Italy. E-mail: m.ghedini@unical.it; Fax: +39 (0)984 492066; Tel: +39 (0)984 492062

<sup>b</sup> LASCAMM, CR-INSTM Unità della Basilicata and LaMI, Dipartimento di Chimica, Università della Basilicata, I-85100 Potenza, Italy. E-mail: lelj@unibas.it Tel: +39 (0)971 202246

Complex **1** optimised geometry at the B3LYP/6-31G(d) level of approximation.  
The Cartesian coordinates are reported in Ångstrom.

|    |           |           |           |
|----|-----------|-----------|-----------|
| Al | -0.294268 | -0.090843 | -0.090060 |
| O  | -1.310713 | -1.179256 | -1.282109 |
| N  | -2.172004 | 0.374783  | 0.674611  |
| N  | 1.458945  | -1.069753 | -0.696072 |
| 8  | 0.271290  | -0.694733 | 1.628789  |
| C  | -2.623827 | -1.106578 | -1.109825 |
| C  | -3.552702 | -1.791516 | -1.881947 |
| C  | -4.936711 | -1.659892 | -1.625280 |
| C  | -5.425672 | -0.859454 | -0.611669 |
| C  | -4.511744 | -0.142570 | 0.201938  |
| C  | -3.121772 | -0.273750 | -0.054441 |
| C  | -4.861134 | 0.714801  | 1.273822  |
| C  | -3.881835 | 1.361790  | 1.996128  |
| C  | -2.513172 | 1.179473  | 1.678160  |
| C  | -1.420639 | 1.867502  | 2.447405  |
| H  | -4.144964 | 2.020330  | 2.817403  |
| H  | -5.910506 | 0.858146  | 1.520919  |
| H  | -6.492555 | -0.770226 | -0.429344 |
| H  | -5.633102 | -2.211524 | -2.251683 |
| H  | -3.199042 | -2.429838 | -2.685451 |
| C  | 1.990053  | -1.207868 | -1.908828 |
| C  | 3.217209  | -1.899882 | -2.063903 |
| C  | 3.864756  | -2.432879 | -0.970907 |
| C  | 3.311300  | -2.293747 | 0.325510  |
| C  | 2.085354  | -1.583129 | 0.399135  |
| C  | 1.416235  | -1.365548 | 1.646826  |
| C  | 2.005913  | -1.874649 | 2.795836  |
| C  | 3.227801  | -2.582278 | 2.720558  |
| C  | 3.881042  | -2.796850 | 1.523033  |
| C  | 1.256598  | -0.621869 | -3.082152 |
| H  | 3.637212  | -2.002764 | -3.059014 |
| H  | 4.805697  | -2.963959 | -1.094567 |
| H  | 4.819585  | -3.341876 | 1.483784  |
| H  | 3.660278  | -2.966838 | 3.640655  |
| H  | 1.511978  | -1.723395 | 3.750443  |
| O  | 0.059927  | 1.603513  | -0.738789 |
| C  | 1.124997  | 2.407452  | -0.567468 |
| C  | 1.283682  | 3.487691  | -1.455979 |
| C  | 2.357326  | 4.363896  | -1.322898 |
| C  | 3.300030  | 4.187182  | -0.305723 |
| C  | 3.144680  | 3.119903  | 0.579798  |

|   |           |           |           |
|---|-----------|-----------|-----------|
| C | 2.073838  | 2.233517  | 0.457170  |
| H | 0.541500  | 3.617824  | -2.238617 |
| H | 2.457976  | 5.192682  | -2.020165 |
| H | 4.137372  | 4.871775  | -0.203810 |
| H | 3.866221  | 2.971718  | 1.380196  |
| H | 1.959573  | 1.423018  | 1.171368  |
| H | 0.253804  | -1.054596 | -3.152166 |
| H | 1.131539  | 0.458722  | -2.955031 |
| H | 1.797965  | -0.806661 | -4.013468 |
| H | -0.821887 | 2.501931  | 1.784482  |
| H | -1.835621 | 2.489627  | 3.244577  |
| H | -0.742982 | 1.126156  | 2.882651  |

Complex **1** TD-DFT electronic transitions at the B3LYP/6-31G(d) level of approximation. Each line lists the transition energy (eV), the relative transition wavelength (nm) and the oscillator strength of all the computed transitions.

2.8598 , 433.54 , 0.0007  
 2.9763 , 416.58 , 0.0005  
 3.1037 , 399.47 , 0.0819  
 3.1837 , 389.43 , 0.0052  
 3.2834 , 377.60 , 0.0044  
 3.3544 , 369.62 , 0.0040  
 3.9129 , 316.86 , 0.0001  
 4.0615 , 305.27 , 0.0004  
 4.1148 , 301.31 , 0.0003  
 4.1823 , 296.45 , 0.0025  
 4.1944 , 295.59 , 0.0012  
 4.2106 , 294.46 , 0.0011  
 4.5015 , 275.43 , 0.0015  
 4.5683 , 271.40 , 0.0024  
 4.7065 , 263.43 , 0.0018  
 4.7441 , 261.34 , 0.0019  
 4.8525 , 255.50 , 0.0040  
 4.9221 , 251.89 , 0.0022  
 5.0143 , 247.26 , 0.1096  
 5.0259 , 246.69 , 0.0949  
 5.1104 , 242.61 , 0.6850  
 5.1531 , 240.60 , 0.0093  
 5.1611 , 240.23 , 0.0203  
 5.2493 , 236.19 , 0.0011  
 5.2885 , 234.44 , 0.0004  
 5.4125 , 229.07 , 0.0036  
 5.4240 , 228.58 , 0.0203  
 5.4865 , 225.98 , 0.0067  
 5.5217 , 224.54 , 0.0009  
 5.5313 , 224.15 , 0.0191

Complex **2** optimised geometry at the B3LYP/6-31G(d) level of approximation.  
 The Cartesian coordinates are reported in Ångstrom.

|    |           |           |           |
|----|-----------|-----------|-----------|
| Al | 0.613304  | 0.218968  | -0.086089 |
| O  | 1.929443  | 0.964968  | -1.239634 |
| N  | 2.234219  | -0.834770 | 0.673733  |
| N  | -0.757858 | 1.683905  | -0.682469 |
| O  | 0.195372  | 0.888580  | 1.645839  |
| C  | 3.152896  | 0.478986  | -1.063647 |
| C  | 4.258485  | 0.860824  | -1.810712 |
| C  | 5.528670  | 0.295789  | -1.553137 |
| C  | 5.728405  | -0.645249 | -0.562568 |
| C  | 4.625479  | -1.062196 | 0.225210  |
| C  | 3.349532  | -0.496048 | -0.032530 |

|   |           |           |           |
|---|-----------|-----------|-----------|
| C | 4.676575  | -2.014311 | 1.272246  |
| C | 3.535481  | -2.340871 | 1.972556  |
| C | 2.296361  | -1.731813 | 1.655856  |
| C | 1.037361  | -2.065955 | 2.405304  |
| H | 3.569654  | -3.069666 | 2.775590  |
| H | 5.625323  | -2.485328 | 1.518374  |
| H | 6.711161  | -1.068871 | -0.378200 |
| H | 6.370877  | 0.619162  | -2.159307 |
| H | 4.132576  | 1.600347  | -2.595139 |
| C | -1.183830 | 2.023068  | -1.898044 |
| C | -2.154798 | 3.045145  | -2.042632 |
| C | -2.661864 | 3.693084  | -0.937507 |
| C | -2.217428 | 3.344538  | 0.361287  |
| C | -1.248288 | 2.310005  | 0.424621  |
| C | -0.712749 | 1.859034  | 1.673333  |
| C | -1.172268 | 2.464644  | 2.834088  |
| C | -2.140193 | 3.493781  | 2.769427  |
| C | -2.662472 | 3.936995  | 1.570649  |
| C | -0.607039 | 1.307240  | -3.086810 |
| H | -2.492306 | 3.308197  | -3.039593 |
| H | -3.407305 | 4.476181  | -1.053724 |
| H | -3.405693 | 4.728130  | 1.539324  |
| H | -2.477921 | 3.945411  | 3.698457  |
| H | -0.774539 | 2.138665  | 3.789916  |
| O | -0.250669 | -1.264360 | -0.806325 |
| C | -1.475447 | -1.755144 | -0.621621 |
| C | -1.933870 | -2.746366 | -1.516753 |
| C | -3.195450 | -3.301571 | -1.379652 |
| C | -4.048276 | -2.886042 | -0.338480 |
| C | -3.594403 | -1.905018 | 0.560170  |
| C | -2.330833 | -1.346189 | 0.424196  |
| H | -1.267065 | -3.061701 | -2.313419 |
| H | -3.534703 | -4.062274 | -2.076378 |
| C | -5.352546 | -3.453731 | -0.195420 |
| H | -4.244072 | -1.584638 | 1.369233  |
| H | -1.994129 | -0.604930 | 1.141847  |
| H | 0.475075  | 1.464282  | -3.130245 |
| H | -0.768644 | 0.227328  | -3.003389 |
| H | -1.063158 | 1.661095  | -4.014695 |
| H | 0.277302  | -2.468166 | 1.726438  |
| H | 1.231805  | -2.807025 | 3.184616  |
| H | 0.618822  | -1.163018 | 2.860701  |
| N | -6.415446 | -3.916346 | -0.080869 |

Complex **2** TD-DFT electronic transitions at the B3LYP/6-31G(d) level of approximation. Each line lists the transition energy (eV), the relative transition wavelength (nm) and the oscillator strength of all the computed transitions.

3.1013 , 399.77 , 0.0805  
 3.1647 , 391.77 , 0.0049  
 3.1925 , 388.36 , 0.0031  
 3.2820 , 377.76 , 0.0019  
 3.2900 , 376.85 , 0.0039  
 3.3667 , 368.26 , 0.0041  
 4.1853 , 296.23 , 0.0016  
 4.1976 , 295.37 , 0.0007  
 4.3851 , 282.74 , 0.0003  
 4.4379 , 279.37 , 0.0006  
 4.5166 , 274.50 , 0.0020  
 4.5264 , 273.91 , 0.0029

4.5277 , 273.83 , 0.0007  
4.5932 , 269.93 , 0.0029  
4.6922 , 264.24 , 0.0019  
4.7278 , 262.24 , 0.0019  
4.8056 , 258.00 , 0.0018  
4.8856 , 253.77 , 0.0067  
4.9320 , 251.39 , 0.0037  
5.0143 , 247.26 , 0.4038  
5.0257 , 246.70 , 0.0509  
5.0897 , 243.60 , 0.1348  
5.1217 , 242.08 , 0.7274  
5.1311 , 241.63 , 0.1173  
5.1560 , 240.47 , 0.0037  
5.1969 , 238.57 , 0.0020  
5.3007 , 233.90 , 0.0027  
5.3450 , 231.96 , 0.0003  
5.4602 , 227.07 , 0.0217  
5.5399 , 223.80 , 0.0073

Complex **3** optimised geometry at the B3LYP/6-31G(d) level of approximation.  
The Cartesian coordinates are reported in Ångstrom.

|    |           |           |           |
|----|-----------|-----------|-----------|
| Al | 0.853716  | 0.225104  | -0.089652 |
| O  | 2.262711  | 0.745566  | -1.255600 |
| N  | 2.297597  | -1.049663 | 0.685505  |
| N  | -0.277693 | 1.872494  | -0.708474 |
| O  | 0.535329  | 0.967662  | 1.633193  |
| C  | 3.401419  | 0.087188  | -1.069016 |
| C  | 4.551630  | 0.291584  | -1.818013 |
| C  | 5.724463  | -0.450690 | -1.548735 |
| C  | 5.782210  | -1.396623 | -0.544537 |
| C  | 4.629294  | -1.634935 | 0.246050  |
| C  | 3.450981  | -0.890673 | -0.023466 |
| C  | 4.538959  | -2.567842 | 1.307580  |
| C  | 3.362156  | -2.711051 | 2.010279  |
| C  | 2.226715  | -1.930313 | 1.682061  |
| C  | 0.933014  | -2.062357 | 2.435419  |
| H  | 3.288633  | -3.424164 | 2.824604  |
| H  | 5.407570  | -3.170071 | 1.563248  |
| H  | 6.691511  | -1.957930 | -0.351319 |
| H  | 6.605683  | -0.263732 | -2.156804 |
| H  | 4.536608  | 1.030408  | -2.612957 |
| C  | -0.646145 | 2.256972  | -1.929580 |
| C  | -1.444577 | 3.416526  | -2.090234 |
| C  | -1.841519 | 4.152924  | -0.995462 |
| C  | -1.456227 | 3.757854  | 0.308849  |
| C  | -0.663520 | 2.583602  | 0.388876  |
| C  | -0.206948 | 2.071157  | 1.644896  |
| C  | -0.564906 | 2.757948  | 2.795944  |
| C  | -1.356049 | 3.927475  | 2.714710  |
| C  | -1.801024 | 4.431003  | 1.508636  |
| C  | -0.191555 | 1.442145  | -3.107681 |
| H  | -1.737789 | 3.714431  | -3.091369 |
| H  | -2.454176 | 5.042013  | -1.124179 |
| H  | -2.409730 | 5.329156  | 1.464355  |
| H  | -1.617858 | 4.439953  | 3.636582  |
| H  | -0.225031 | 2.385867  | 3.757227  |
| O  | -0.227897 | -1.121041 | -0.793344 |
| C  | -1.504791 | -1.429222 | -0.592733 |

|   |           |           |           |
|---|-----------|-----------|-----------|
| C | -2.104163 | -2.370265 | -1.462256 |
| C | -3.429784 | -2.737751 | -1.309322 |
| C | -4.183311 | -2.168196 | -0.277063 |
| C | -3.615345 | -1.242485 | 0.600914  |
| C | -2.287362 | -0.873774 | 0.445961  |
| H | -1.492575 | -2.796429 | -2.251337 |
| H | -3.896788 | -3.456867 | -1.971430 |
| H | -4.225361 | -0.825822 | 1.393420  |
| H | -1.843485 | -0.168347 | 1.140727  |
| H | 0.901759  | 1.414995  | -3.145774 |
| H | -0.533014 | 0.405625  | -3.015512 |
| H | -0.577714 | 1.857559  | -4.041756 |
| H | 0.121520  | -2.363901 | 1.763865  |
| H | 1.018272  | -2.807794 | 3.229945  |
| H | 0.650247  | -1.099066 | 2.871186  |
| N | -5.577556 | -2.547801 | -0.112744 |
| O | -6.051833 | -3.370927 | -0.902365 |
| O | -6.217260 | -2.027576 | 0.807370  |

Complex **3** TD-DFT electronic transitions at the B3LYP/6-31G(d) level of approximation. Each line lists the transition energy (eV), the relative transition wavelength (nm) and the oscillator strength of all the computed transitions.

|        |          |          |
|--------|----------|----------|
| 3.0980 | , 400.21 | , 0.0809 |
| 3.1822 | , 389.62 | , 0.0091 |
| 3.2890 | , 376.96 | , 0.0038 |
| 3.3555 | , 369.49 | , 0.0029 |
| 3.3733 | , 367.54 | , 0.0007 |
| 3.4848 | , 355.78 | , 0.0045 |
| 3.7081 | , 334.36 | , 0.0003 |
| 3.8133 | , 325.13 | , 0.0000 |
| 3.8494 | , 322.09 | , 0.0014 |
| 4.0825 | , 303.70 | , 0.4122 |
| 4.1854 | , 296.23 | , 0.0006 |
| 4.1976 | , 295.37 | , 0.0010 |
| 4.3806 | , 283.03 | , 0.0001 |
| 4.4245 | , 280.22 | , 0.0005 |
| 4.5266 | , 273.90 | , 0.0021 |
| 4.5412 | , 273.02 | , 0.0007 |
| 4.5677 | , 271.44 | , 0.0028 |
| 4.5875 | , 270.26 | , 0.0026 |
| 4.6464 | , 266.84 | , 0.0004 |
| 4.6944 | , 264.11 | , 0.0019 |
| 4.7160 | , 262.90 | , 0.0017 |
| 4.7314 | , 262.04 | , 0.0014 |
| 4.7428 | , 261.42 | , 0.0001 |
| 4.8542 | , 255.41 | , 0.0001 |
| 5.0134 | , 247.31 | , 0.1493 |
| 5.0823 | , 243.95 | , 0.0878 |
| 5.0947 | , 243.36 | , 0.0654 |
| 5.1063 | , 242.81 | , 0.4549 |
| 5.1299 | , 241.69 | , 0.0273 |
| 5.1551 | , 240.50 | , 0.0023 |
| 5.1677 | , 239.92 | , 0.0791 |
| 5.2140 | , 237.79 | , 0.0016 |
| 5.2773 | , 234.94 | , 0.0002 |
| 5.2784 | , 234.89 | , 0.0045 |
| 5.3091 | , 233.53 | , 0.0002 |
